# Supplementary material for: Modulation of Gut Microbiota by Magnesium Isoglycyrrhizinate Mediates Enhancement of Intestinal Barrier Function and Amelioration of Methotrexate-Induced Liver Injury
Source: PubMed Central journal article supplement (PMC9134347; doi:10.3389/fimmu.2022.874878), 2022-05-12
Supplement: DataSheet_1.pdf [file DataSheet_1.pdf]

A

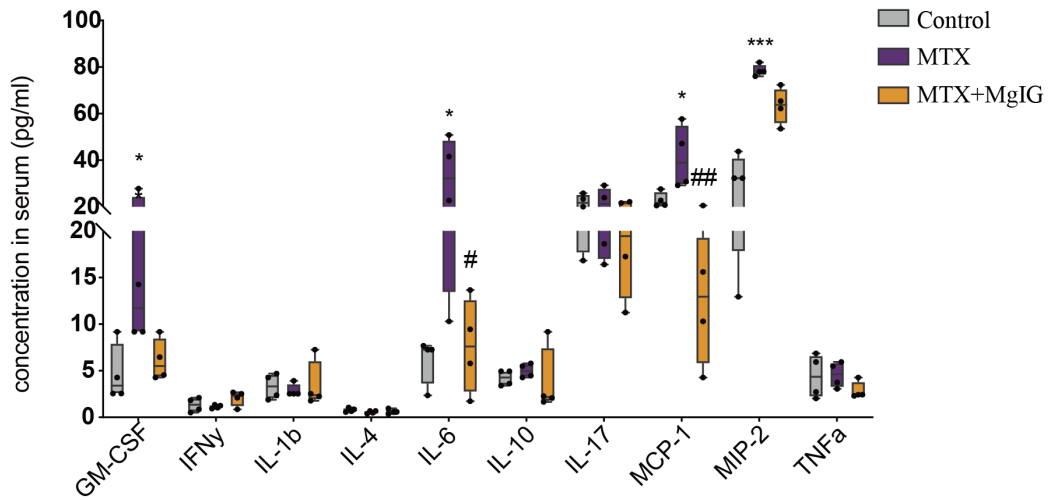

B

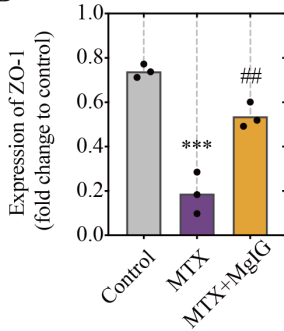

C

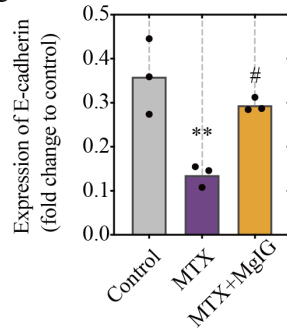

D

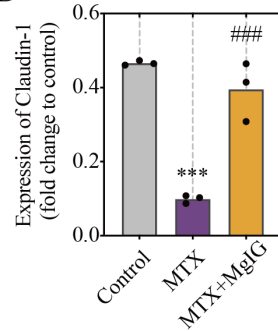

**Supplementary Figure 1.** MgIG suppressed MTX-induced inflammation and intestinal barrier disruption. (A) Histogram of luminex analysis (n=4). (B-D) Quantification analysis of tight junction and E-cadherin (n=3).

\*p<0.05, \*\*p<0.01, \*\*\*p<0.001, compared with Control group. #p<0.05, ##p<0.01, ###p<0.001, compared with MTX group.

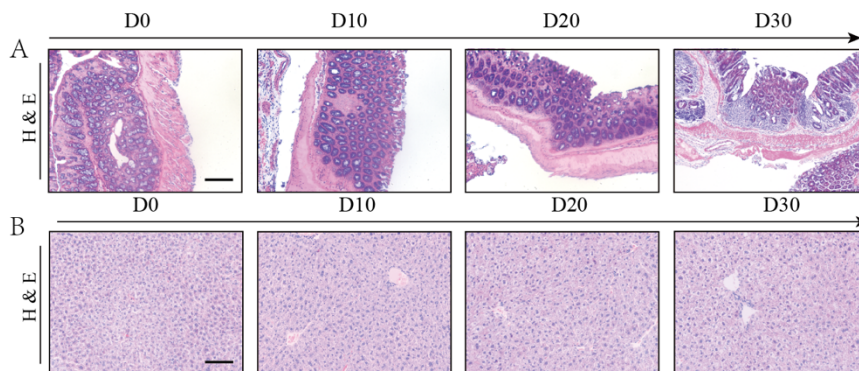

**Supplementary Figure 2.** MTX-induced intestinal barrier disruption occurred before hepatic lesion

(A-B) Representative H&E staining of liver and colon tissues from different timepoints.

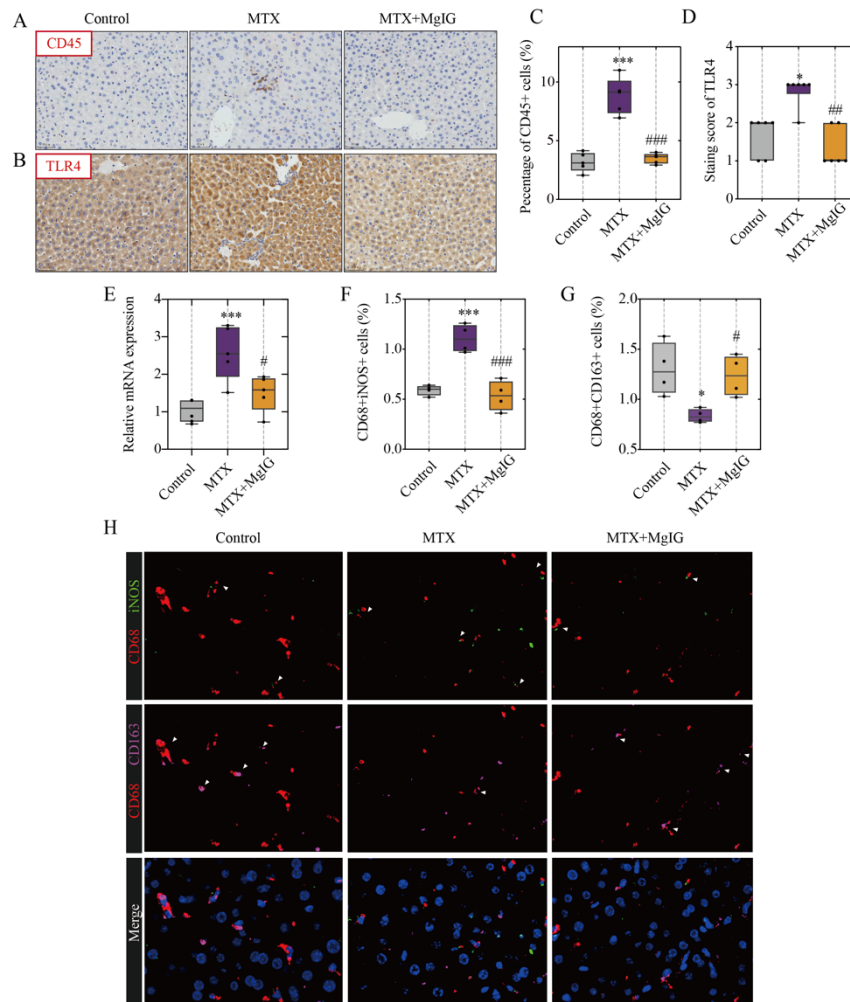

**Supplementary Figure 3.** MgIG inhibited the activation of LPS-related inflammatory signaling pathway caused in the liver (A) Immunohistochemical staining of CD45+ leukocytes. (B) Immunohistochemical staining of TLR4 expression in the liver. (C) Quantification of the percentage of CD45+ cells. (D) Quantification of staining score of TLR4 according to the color depth. (E) Relative mRNA expression of Tlr4 in liver tissue (n=6). (F-G) Proportion of CD68+iNOS+ or CD68+CD163+ macrophages. (H) Representative multiple immunofluorescence staining from each group. Arrows indicate positive cells.

\* $p < 0.05$ , \*\*\* $p < 0.001$ , compared with Control group. # $p < 0.05$ , ## $p < 0.01$ , ### $p < 0.001$ , compared with MTX group.

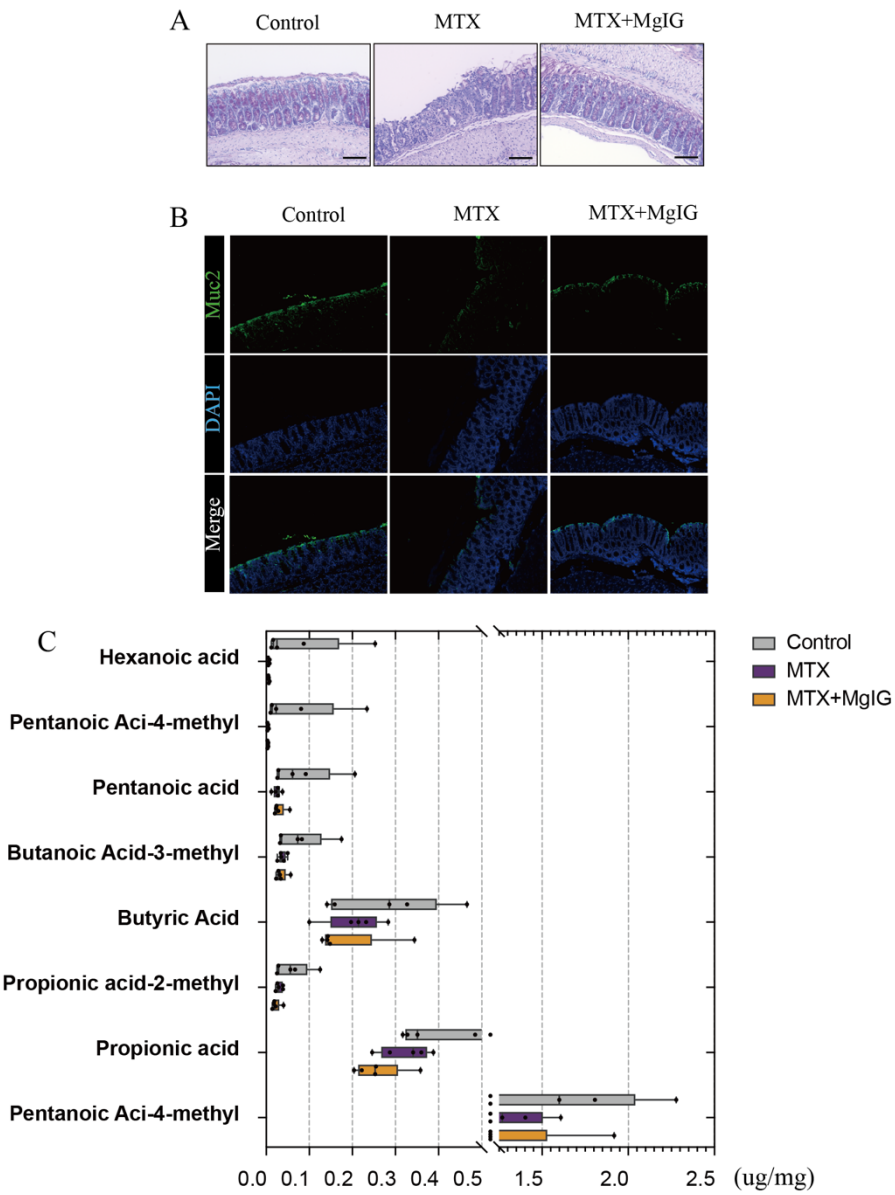

**Supplementary Figure 4.** MgIG restored the intestinal mucus layer (A) Periodic Acid-Schiff staining images from each group. (B) Immunofluorescence of Mucin-2 of colon sections. (C) SCFAs level in feces measured by GC-MS.

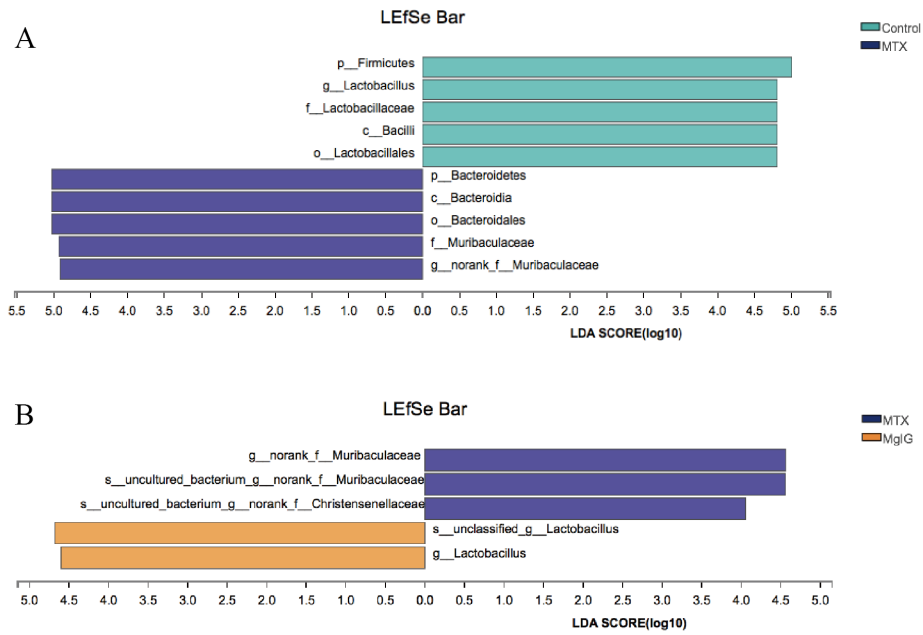

**Supplementary Figure 5.** MgIG altered the gut microbial composition (A-B) Linear discriminant analysis (LDA) scores derived from LEfSe analysis, showing biomarker taxa at the genus level (LDA score) of >4 and a significance of  $P < 0.05$  determined by the Wilcoxon signed-rank test. A presented the difference between control and MTX group. B presented the difference between MTX and MTX+MgIG group.

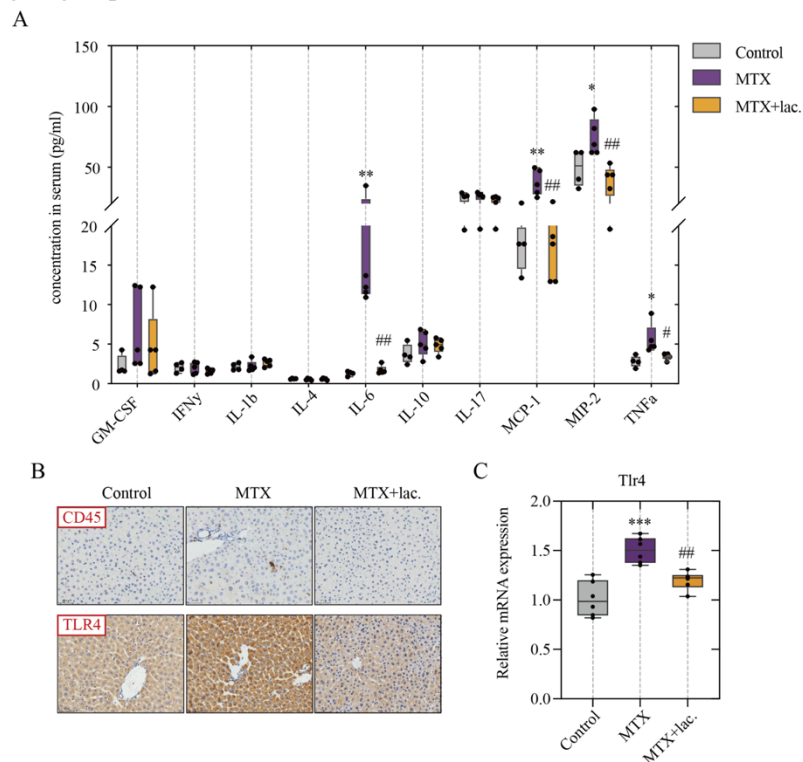

**Supplementary Figure 6.** *Lactobacillus. sp.* inhibited the activation of LPS-related inflammatory signaling pathway caused in the liver (A) FACS staining results of immune cells (neutrophils, monocytes and macrophages) infiltration indicated by the percentage of CD45+ cells. (B) Immunohistochemical staining of CD45+ leukocytes. (C) Immunohistochemical staining of TLR4 in the liver. (D) Relative mRNA expression level of TLR4 (n=6). (E) Histogram of luminex analysis. \*p<0.05, \*\*p<0.01, \*\*\*p<0.001, compared with Control group. #p<0.05, ##p<0.01, compared with MTX group.

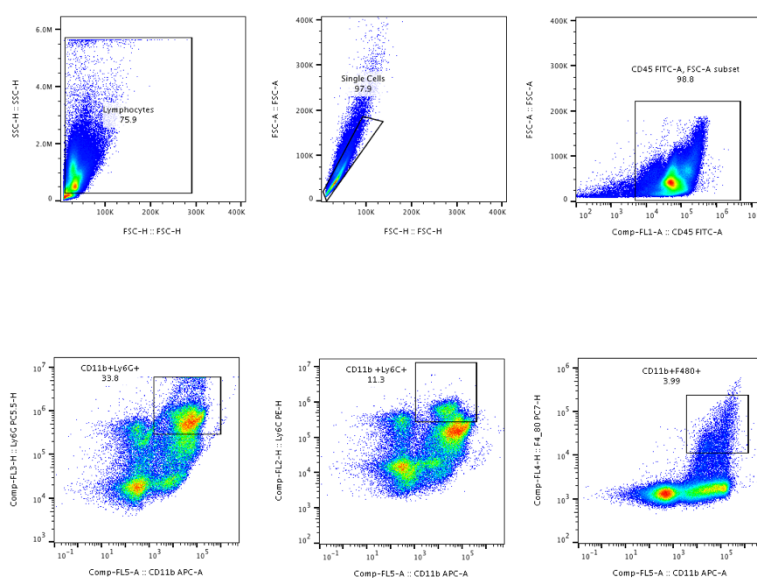

**Supplementary Figure 7.** Gating methods of cytometry figures (Fig 2D, 8D, 9G)

**Supplementary Table 1.**

Table 1. Ishak grading score system of histopathological assessment

| Histology Characteristics | Grading Score |
|---------------------------|---------------|
| A piecemeal necrosis      | 0-4           |
| B confluent necrosis      | 0-6           |
| C focal necrosis          | 0-4           |
| D portal inflammation     | 0-4           |

\*Total score=A+B+C+D. The maximum grading score is 18.
